# Supplementary material
Source: PubMed Central journal article supplement (PMC3143211)

# Supplemental Figure 1

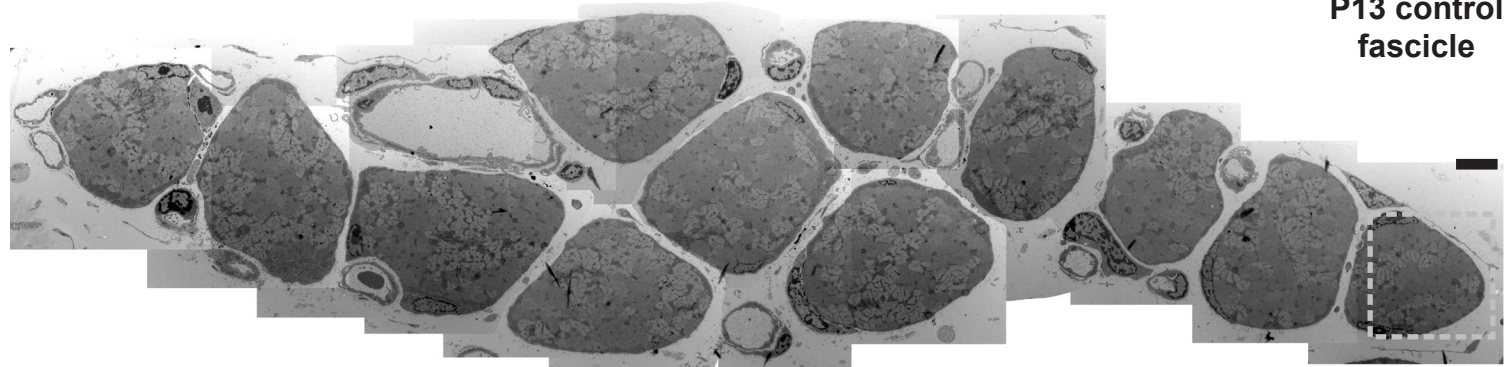

**Examination of individual muscle fibers by EM.** P13 mutant soleus muscle fibers appear indistinguishable from their control counterparts, save for the smaller size, and do not reveal any structural signs of atrophy. Boxed area from each fascicle is shown under higher magnification. Scale bars = 5 $\mu$ m.

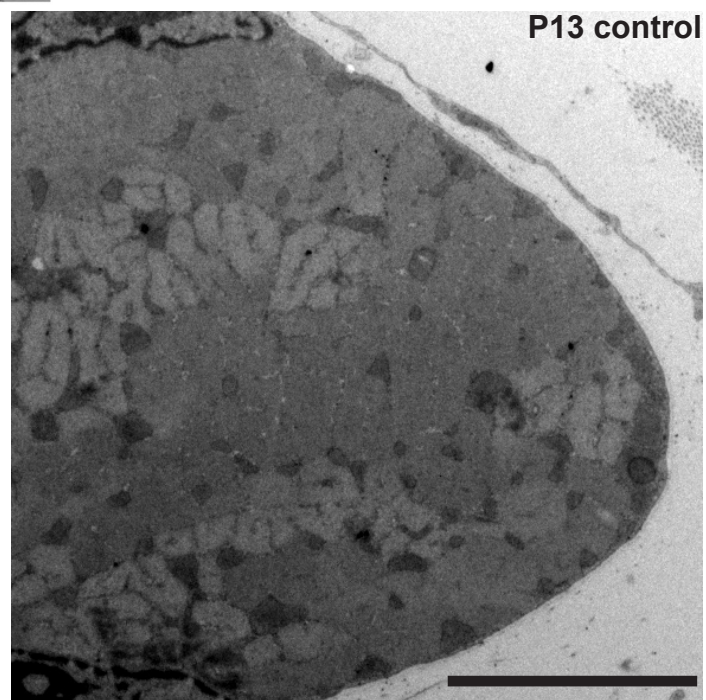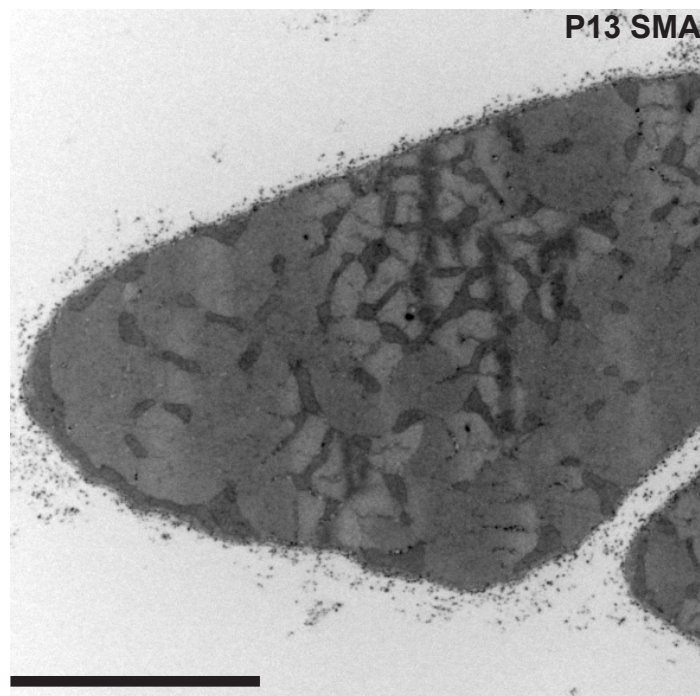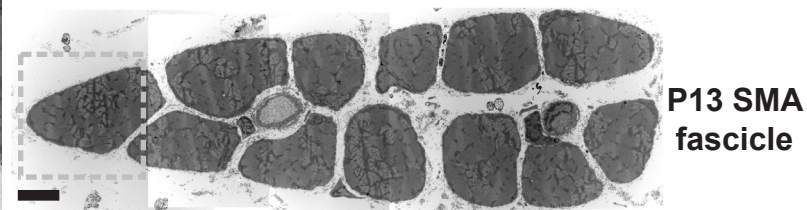

Supplement: NIHMS301264-supplement-01.pdf [file NIHMS301264-supplement-01.pdf]
