# Supplementary material
Source: PubMed Central journal article supplement (PMC3143211)
Supplement: NIHMS301264-supplement-02.pdf [file NIHMS301264-supplement-02.pdf]

# Supplemental Figure 2

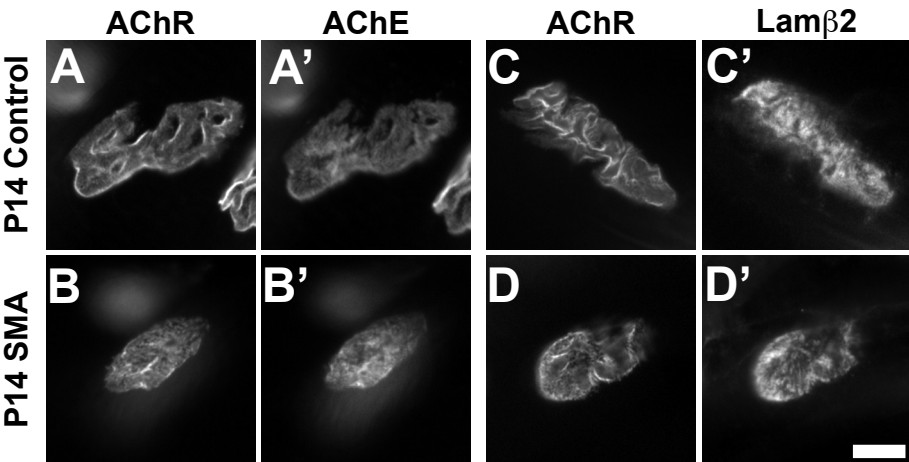

**Distribution of synaptic basal lamina components are normal at SMA $\Delta$ 7 mutant NMJs.** At both control (A,C) and mutant (B,D) NMJs, AChE (A',B') and laminin- $\beta$ 2 (C',D') display proper synaptic localization. Scale bar = 10 $\mu$ m.
